# Supplementary material
Source: PubMed Central journal article supplement (PMC6815349)
Supplement: NIHMS1053449-supplement-1.pdf [file NIHMS1053449-supplement-1.pdf]

### Supplementary Material\*

Donohue JM, Kennedy J, Seymour CW, et al. Patterns of opioid administration among opioid-naive inpatients and associations with postdischarge opioid use. A cohort study. *Ann Intern Med*. doi:10.7326/M18-2864

| Item                                                                                                                                                                                                                                                                                             | Page |
|--------------------------------------------------------------------------------------------------------------------------------------------------------------------------------------------------------------------------------------------------------------------------------------------------|------|
| Supplement Table 1. Diagnosis codes used to define comorbid pain, mental health and substance use disorder conditions                                                                                                                                                                            | 2    |
| Supplement Table 2. Full regression results including all covariates (outcome = opioid use at 90 days post-discharge) corresponding to main effects shown in Table 2                                                                                                                             | 3    |
| Supplement Table 3. Full regression results including all covariates (outcome = opioid use at 365 days post-discharge) corresponding to main effects shown in Table 2                                                                                                                            | 6    |
| Supplement Table 4. Relative risk ratios from full multinomial model for outpatient reported opioid use at 90 days after discharge, among patients receiving inpatient opioids who were previously opioid naive                                                                                  | 9    |
| Supplement Table 5. Relative risk ratios from full multinomial for outpatient reported opioid use at 365 days after discharge, among patients receiving inpatient opioids who were previously opioid naive                                                                                       | 13   |
| Supplement Table 6. Sensitivity analysis of the association between any inpatient opioid use and outpatient opioid use, mortality and readmission at 90 and 365 days post-discharge, after removal of stays for trauma/orthopedic, or oncological conditions                                     | 17   |
| Supplement Table 7. Sensitivity analysis of the association between patterns of inpatient opioid administration and outpatient opioid use at 90 and 365 days after discharge among patients receiving inpatient opioids, after removal of stays for trauma/orthopedic, or oncological conditions | 18   |
| Supplement Table 8. Descriptive characteristics of opioid naive inpatient discharges, by hospital                                                                                                                                                                                                | 19   |
| Supplement Table 9. Examination of effect modification by hospital of the association between any inpatient opioid use and outpatient opioid use, 90 days post-discharge                                                                                                                         | 22   |
| Supplement Table 10. Examination of effect modification by hospital of the association between any inpatient opioid use and outpatient opioid use, 365 days post-discharge                                                                                                                       | 23   |

\* This supplementary material was provided by the authors to give readers further details on their article. The material was reviewed but not copyedited.

**Supplement Table 1. Diagnosis codes used to define comorbid pain, mental health and substance use disorder conditions**

| <b>INTERNATIONAL CLASSIFICATION OF DISEASES, 9<sup>TH</sup> REVISION CODES FOR COMORBID CONDITIONS</b> |                                                                                                                                                                                                                               |
|--------------------------------------------------------------------------------------------------------|-------------------------------------------------------------------------------------------------------------------------------------------------------------------------------------------------------------------------------|
| <b>Musculoskeletal Pain Conditions</b>                                                                 | 710.xx-739.xx                                                                                                                                                                                                                 |
| <b>Depression</b>                                                                                      | 293.83,296.2,296.3,296.90,296.99,298.0,300.4,301.12,309.0,309.1,311                                                                                                                                                           |
| <b>Other Mental Disorders</b>                                                                          | 295.0, 295.1, 295.2, 295.3, 295.4, 295.6, 295.7, 295.8, 295.9<br>296.0,296.1,296.4,296.5,296.6,296.7, 296.8, 297.0, 297.1, 297.2, 297.3, 297.8, 297.9, 298.0, 298.1,298.2, 298.3, 298.4, 298.8, 298.9<br>290-290.9, 331-331.2 |
| <b>Alcohol Use Disorders</b>                                                                           | V113.x, V791.x, 291.0-291.9, 303.0-303.9                                                                                                                                                                                      |
| <b>Drug Dependence (any substance) /Opioid-Related Narcotic Poisoning</b>                              | Drug Dependence - 304.0-304.93<br>Poisoning by opiates and related narcotics - 965.00, 965.01, 965.02 and 965.09<br>Accidental poisoning by opiates and related narcotics - E850.0-E850.2                                     |

Notes: International Classification of Diseases, 9<sup>th</sup> revision Diagnosis codes were extracted from the inpatient electronic health record to create these comorbidities.

**Supplement Table 2. Full regression results including all covariates (outcome = opioid use at 90 days post-discharge) corresponding to main effects shown in Table 2.**

|                         | Outcome 1: Outpatient use in 90-Day |            |         | Outcome 2: 90-Day Mortality |             |         | Outcome 3: 90-Day Readmission |            |         |
|-------------------------|-------------------------------------|------------|---------|-----------------------------|-------------|---------|-------------------------------|------------|---------|
|                         | Relative Risk Ratio                 | 95% CI     | P-Value | Relative Risk Ratio         | 95% CI      | P-Value | Relative Risk Ratio           | 95% CI     | P-Value |
| <b>Hospital Opioids</b> | 2.07                                | 1.97, 2.18 | <0.001  | 1.33                        | 1.18, 1.50  | <0.001  | 1.01                          | 0.98, 1.03 | 0.68    |
| <b>Hospital</b>         |                                     |            |         |                             |             |         |                               |            |         |
| <b>1</b>                | Ref                                 | Ref        | Ref     | Ref                         | Ref         | Ref     | Ref                           | Ref        | Ref     |
| <b>2</b>                | 1.43                                | 1.31, 1.57 | <0.001  | 1.90                        | 1.40, 2.57  | <0.001  | 1.45                          | 1.39, 1.51 | <0.001  |
| <b>3</b>                | 1.21                                | 1.09, 1.34 | <0.001  | 1.86                        | 1.36, 2.54  | <0.001  | 1.51                          | 1.43, 1.58 | <0.001  |
| <b>4</b>                | 1.26                                | 1.13, 1.39 | <0.001  | 1.64                        | 1.18, 2.27  | 0.003   | 1.35                          | 1.28, 1.42 | <0.001  |
| <b>5</b>                | 1.91                                | 1.73, 2.12 | <0.001  | 1.22                        | 1.62, 3.03  | <0.001  | 1.29                          | 1.23, 1.37 | <0.001  |
| <b>6</b>                | 1.29                                | 1.15, 1.45 | <0.001  | 1.69                        | 1.23, 2.32  | 0.001   | 1.45                          | 1.38, 1.54 | <0.001  |
| <b>7</b>                | 1.97                                | 1.76, 2.21 | <0.001  | 1.87                        | 1.30, 2.70  | 0.001   | 1.69                          | 1.59, 1.80 | <0.001  |
| <b>8</b>                | 1.10                                | 0.92, 1.33 | 0.30    | 2.31                        | 1.64, 3.27  | <0.001  | 1.43                          | 1.33, 1.53 | <0.001  |
| <b>9</b>                | 1.53                                | 1.32, 1.78 | <0.001  | 2.80                        | 1.95, 4.01  | <0.001  | 1.52                          | 1.42, 1.64 | <0.001  |
| <b>10</b>               | 1.57                                | 1.33, 1.86 | <0.001  | 1.73                        | 1.15, 2.61  | 0.008   | 1.64                          | 1.52, 1.78 | <0.001  |
| <b>11</b>               | 1.64                                | 1.41, 1.92 | <0.001  | 1.71                        | 1.15, 2.54  | 0.008   | 1.64                          | 1.51, 1.79 | <0.001  |
| <b>12</b>               | 1.46                                | 1.09, 1.96 | 0.012   | 2.55                        | 1.57, 4.15  | <0.001  | 1.74                          | 1.54, 1.97 | <0.001  |
| <b>Age</b>              |                                     |            |         |                             |             |         |                               |            |         |
| <b>18-24</b>            | Ref                                 | Ref        | Ref     | Ref                         | Ref         | Ref     | Ref                           | Ref        | Ref     |
| <b>25-34</b>            | 1.18                                | 1.03, 1.34 | 0.015   | 1.14                        | 0.34, 3.72  | 0.83    | 0.76                          | 0.72, 0.80 | <0.001  |
| <b>35-44</b>            | 1.67                                | 1.46, 1.92 | <0.001  | 3.44                        | 1.18, 10.00 | 0.024   | 0.87                          | 0.82, 0.92 | <0.001  |
| <b>45-54</b>            | 2.00                                | 1.74, 2.29 | <0.001  | 6.36                        | 2.29, 17.61 | <0.001  | 0.91                          | 0.86, 0.96 | 0.001   |
| <b>55-64</b>            | 1.82                                | 1.58, 2.08 | <0.001  | 8.85                        | 3.22, 24.28 | <0.001  | 0.91                          | 0.86, 0.97 | 0.002   |

|                                     |      |            |        |       |                |        |      |            |        |
|-------------------------------------|------|------------|--------|-------|----------------|--------|------|------------|--------|
| <b>64-74</b>                        | 1.71 | 1.48, 1.98 | <0.001 | 15.20 | 5.52,<br>41.90 | <0.001 | 0.88 | 0.83, 0.94 | <0.001 |
| <b>75+</b>                          | 1.38 | 1.19, 1.61 | <0.001 | 43.67 | 15.91,<br>120. | <0.001 | 1.05 | 0.99, 1.12 | 0.108  |
| <b>Sex (ref = female)</b>           | 0.96 | 0.90, 1.01 | 0.119  | 1.19  | 1.08, 1.31     | 0.001  | 1.16 | 1.13, 1.19 | <0.001 |
| <b>Race</b>                         |      |            |        |       |                |        |      |            |        |
| <b>White</b>                        | Ref  | Ref        | Ref    | Ref   | Ref            | Ref    | Ref  | Ref        | Ref    |
| <b>Black</b>                        | 0.90 | 0.81, 0.99 | 0.028  | 1.03  | 0.86, 1.24     | 0.76   | 1.41 | 1.36, 1.47 | <0.001 |
| <b>Other</b>                        | 0.81 | 0.69, 0.95 | 0.009  | 0.67  | 0.43, 1.03     | 0.067  | 1.02 | 0.95, 1.10 | 0.51   |
| <b>Year of Admission</b>            |      |            |        |       |                |        |      |            |        |
| <b>2010</b>                         | Ref  | Ref        | Ref    | Ref   | Ref            | Ref    | Ref  | Ref        | Ref    |
| <b>2011</b>                         | 1.11 | 1.02, 1.21 | 0.014  | 1.90  | 1.48, 2.44     | <0.001 | 0.95 | 0.91, 0.99 | 0.010  |
| <b>2012</b>                         | 1.16 | 1.07, 1.26 | 0.001  | 2.80  | 2.21, 3.56     | <0.001 | 1.02 | 0.98, 1.06 | 0.38   |
| <b>2013</b>                         | 1.21 | 1.11, 1.31 | <0.001 | 2.85  | 2.26, 3.60     | <0.001 | 0.91 | 0.87, 0.94 | <0.001 |
| <b>2014</b>                         | 1.53 | 1.42, 1.66 | <0.001 | 3.38  | 2.68, 4.27     | <0.001 | 0.83 | 0.79, 0.86 | <0.001 |
| <b>Source of payment for stay</b>   |      |            |        |       |                |        |      |            |        |
| <b>Commercial</b>                   | Ref  | Ref        | Ref    | Ref   | Ref            | Ref    | Ref  | Ref        | Ref    |
| <b>Medicare</b>                     | 0.92 | 0.85, 0.99 | 0.026  | 1.27  | 1.11, 1.45     | 0.001  | 1.22 | 1.17, 1.26 | <0.001 |
| <b>Medicaid</b>                     | 1.05 | 0.96, 1.15 | 0.25   | 1.48  | 1.11, 1.99     | 0.008  | 1.49 | 1.43, 1.55 | <0.001 |
| <b>Other</b>                        | 0.97 | 0.88, 1.07 | 0.57   | 1.12  | 0.79, 1.58     | 0.52   | 1.09 | 1.04, 1.15 | 0.001  |
| <b>Elixhauser Comorbidity Index</b> | 0.96 | 0.93, 1.00 | 0.057  | 1.58  | 1.51, 1.66     | <0.001 | 1.17 | 1.15, 1.19 | <0.001 |
| <b>Hospitalization Type</b>         |      |            |        |       |                |        |      |            |        |
| <b>Medical admission only</b>       | Ref  | Ref        | Ref    | Ref   | Ref            | Ref    | Ref  | Ref        | Ref    |
| <b>Medical w/ ICU</b>               | 1.01 | 0.92, 1.12 | 0.80   | 1.41  | 1.23, 1.52     | <0.001 | 0.95 | 0.91, 1.00 | 0.033  |
| <b>Surgical admission only</b>      | 1.31 | 1.24, 1.38 | <0.001 | 0.55  | 0.47, 0.64     | <0.001 | 0.92 | 0.89, 0.95 | <0.001 |
| <b>Surgical w/ ICU</b>              | 1.36 | 1.23, 1.49 | <0.001 | 0.74  | 0.62, 0.88     | 0.001  | 0.97 | 0.92, 1.02 | 0.21   |
| <b>Length of Stay</b>               |      |            |        |       |                |        |      |            |        |
| <b>1-4 days</b>                     | Ref  | Ref        | Ref    | Ref   | Ref            | Ref    | Ref  | Ref        | Ref    |
| <b>5-7 days</b>                     | 1.12 | 1.06, 1.18 | <0.001 | 1.58  | 1.39, 1.80     | <0.001 | 1.39 | 1.35, 1.43 | <0.001 |

|                                                  |      |            |        |      |             |        |      |            |        |
|--------------------------------------------------|------|------------|--------|------|-------------|--------|------|------------|--------|
| <b>8+ days</b>                                   | 0.91 | 0.84, 0.99 | 0.020  | 2.91 | 2.53, 3.35  | <0.001 | 1.76 | 1.70, 1.83 | <0.001 |
| <b>HCUP CCS</b>                                  |      |            |        |      |             |        |      |            |        |
| <b>Cardiovascular Conditions</b>                 | Ref  | Ref        | Ref    | Ref  | Ref         | Ref    | Ref  | Ref        | Ref    |
| <b>Respiratory Conditions</b>                    | 1.22 | 1.08, 1.39 | 0.001  | 1.68 | 1.42, 1.98  | <0.001 | 1.15 | 1.09, 1.21 | <0.001 |
| <b>Gastrointestinal Conditions</b>               | 1.01 | 0.91, 1.11 | 0.87   | 1.04 | 0.84, 1.27  | 0.74   | 1.15 | 1.10, 1.20 | <0.001 |
| <b>Oncologic Conditions</b>                      | 1.35 | 1.23, 1.48 | <0.001 | 2.96 | 2.51, 3.48  | <0.001 | 1.23 | 1.18, 1.29 | <0.001 |
| <b>Genitourinary/Maternal Health Conditions</b>  | 1.02 | 0.92, 1.13 | 0.69   | 1.33 | 1.07, 1.66  | 0.011  | 0.99 | 0.94, 1.04 | 0.68   |
| <b>Neurological and Mental Health Conditions</b> | 0.95 | 0.83, 1.09 | 0.47   | 1.36 | 1.06, 1.74  | 0.015  | 0.97 | 0.91, 1.03 | 0.26   |
| <b>Musculoskeletal, Trauma, and Orthopedic</b>   | 1.32 | 1.22, 1.43 | <0.001 | 0.77 | 0.63, 0.93  | 0.006  | 0.80 | 0.77, 0.83 | <0.001 |
| <b>Endocrine &amp; Hematologic Conditions</b>    | 0.72 | 0.63, 0.82 | <0.001 | 1.35 | 1.04, 1.75  | 0.023  | 1.08 | 1.03, 1.14 | <0.001 |
| <b>Other</b>                                     | 1.09 | 0.99, 1.20 | 0.089  | 1.37 | 1.13, 1.65  | 0.001  | 0.98 | 0.94, 1.03 | 0.40   |
| <b>Comorbidities</b>                             |      |            |        |      |             |        |      |            |        |
| <b>Musculoskeletal Pain</b>                      | 1.55 | 1.47, 1.63 | <0.001 | 1.01 | 0.91, 1.12  | 0.83   | 0.99 | 0.97, 1.02 | 0.68   |
| <b>Depression</b>                                | 1.16 | 1.07, 1.25 | <0.001 | 0.87 | 0.76, 0.99  | 0.040  | 1.00 | 0.97, 1.04 | 0.86   |
| <b>Other Mental Disorders</b>                    | 0.72 | 0.57, 0.89 | 0.003  | 2.80 | 2.43, 3.24  | <0.001 | 1.26 | 1.18, 1.35 | <0.001 |
| <b>Alcohol Use Disorder</b>                      | 0.92 | 0.69, 1.21 | 0.54   | 0.74 | 0.46, 1.20  | 0.22   | 0.92 | 0.82, 1.02 | 0.115  |
| <b>Drug Dependence</b>                           | 1.78 | 1.38, 2.29 | <0.001 | 0.51 | 0.16, 1.65  | 0.26   | 1.28 | 1.14, 1.43 | <0.001 |
| <b>Opioid Poisoning (incl. accidental)</b>       | 0.68 | 0.25, 1.85 | 0.45   | 4.52 | 1.24, 16.55 | 0.023  | 0.88 | 0.57, 1.36 | 0.56   |
| <b>History of Benzodiazepine Use</b>             | 1.07 | 1.00, 1.15 | 0.045  | 1.88 | 1.69, 2.10  | <0.001 | 1.29 | 1.25, 1.33 | <0.001 |

Includes 182,917 cases with complete data from 191,249 inpatient stays of previously opioid-naive patients.

Relative risk ratios estimated against a reference group with no outpatient opioid use, no death, and no readmission within 90 days of discharge.

**Supplement Table 3. Full regression results including all covariates (outcome = opioid use at 365 days post-discharge) corresponding to main effects shown in Table 2.**

|                         | Outcome 1: Outpatient use in 365-Day |            |         | Outcome 2: 365-Day Mortality |             |         | Outcome 3: 365-Day Readmission |            |         |
|-------------------------|--------------------------------------|------------|---------|------------------------------|-------------|---------|--------------------------------|------------|---------|
|                         | Relative Risk Ratio                  | 95% CI     | P-Value | Relative Risk Ratio          | 95% CI      | P-Value | Relative Risk Ratio            | 95% CI     | P-Value |
| <b>Hospital Opioids</b> | 1.84                                 | 1.76, 1.92 | <0.001  | 0.98                         | 0.90, 1.07  | 0.67    | 0.99                           | 0.97, 1.02 | 0.500   |
| <b>Hospital</b>         |                                      |            |         |                              |             |         |                                |            |         |
| <b>1</b>                | Ref                                  | Ref        | Ref     | Ref                          | Ref         | Ref     | Ref                            | Ref        | Ref     |
| <b>2</b>                | 1.40                                 | 1.29, 1.51 | <0.001  | 1.98                         | 1.63, 2.41  | <0.001  | 1.45                           | 1.39, 1.51 | <0.001  |
| <b>3</b>                | 1.30                                 | 1.20, 1.42 | <0.001  | 1.76                         | 1.44, 2.15  | <0.001  | 1.69                           | 1.62, 1.76 | <0.001  |
| <b>4</b>                | 1.33                                 | 1.22, 1.45 | <0.001  | 1.74                         | 1.41, 2.15  | <0.001  | 1.49                           | 1.42, 1.55 | <0.001  |
| <b>5</b>                | 2.00                                 | 1.83, 2.18 | <0.001  | 1.86                         | 1.52, 2.28  | <0.001  | 1.50                           | 1.43, 1.57 | <0.001  |
| <b>6</b>                | 1.52                                 | 1.38, 1.68 | <0.001  | 1.60                         | 1.30, 1.98  | <0.001  | 1.73                           | 1.64, 1.81 | <0.001  |
| <b>7</b>                | 2.20                                 | 2.00, 2.44 | <0.001  | 1.93                         | 1.52, 2.46  | <0.001  | 2.25                           | 2.12, 2.38 | <0.001  |
| <b>8</b>                | 1.35                                 | 1.16, 1.58 | <0.001  | 2.38                         | 1.89, 3.01  | <0.001  | 1.81                           | 1.69, 1.94 | <0.001  |
| <b>9</b>                | 1.83                                 | 1.61, 2.07 | <0.001  | 2.58                         | 2.02, 3.30  | <0.001  | 1.91                           | 1.79, 2.03 | <0.001  |
| <b>10</b>               | 1.69                                 | 1.46, 1.95 | <0.001  | 2.03                         | 1.55, 2.66  | <0.001  | 2.09                           | 1.94, 2.25 | <0.001  |
| <b>11</b>               | 1.79                                 | 1.56, 2.06 | <0.001  | 1.86                         | 1.42, 2.42  | <0.001  | 1.94                           | 1.79, 2.10 | <0.001  |
| <b>12</b>               | 1.74                                 | 1.36, 2.23 | <0.001  | 2.60                         | 1.83, 3.68  | <0.001  | 2.45                           | 2.18, 2.74 | <0.001  |
| <b>Age</b>              |                                      |            |         |                              |             |         |                                |            |         |
| <b>18-24</b>            | Ref                                  | Ref        | Ref     | Ref                          | Ref         | Ref     | Ref                            | Ref        | Ref     |
| <b>25-34</b>            | 1.17                                 | 1.05, 1.32 | 0.007   | 0.72                         | 0.39, 1.35  | 0.31    | 0.66                           | 0.63, 0.69 | <0.001  |
| <b>35-44</b>            | 1.69                                 | 1.50, 1.91 | <0.001  | 1.88                         | 1.08, 3.30  | 0.027   | 0.72                           | 0.68, 0.76 | <0.001  |
| <b>45-54</b>            | 2.13                                 | 1.88, 2.40 | <0.001  | 4.09                         | 2.43, 6.89  | <0.001  | 0.81                           | 0.76, 0.85 | <0.001  |
| <b>55-64</b>            | 1.99                                 | 1.76, 2.24 | <0.001  | 5.52                         | 3.30, 9.23  | <0.001  | 0.80                           | 0.76, 0.85 | <0.001  |
| <b>64-74</b>            | 1.89                                 | 1.66, 2.15 | <0.001  | 8.67                         | 5.16, 14.59 | <0.001  | 0.80                           | 0.75, 0.84 | <0.001  |

|                                     |      |            |        |       |            |        |      |            |        |
|-------------------------------------|------|------------|--------|-------|------------|--------|------|------------|--------|
| <b>75+</b>                          | 1.59 | 1.39, 1.82 | <0.001 | 22.87 | 13.6, 38.4 | <0.001 | 1.01 | 0.96, 1.07 | 0.65   |
| <b>Sex (ref = female)</b>           | 0.97 | 0.93, 1.02 | 0.24   | 1.32  | 1.23, 1.41 | <0.001 | 1.19 | 1.15, 1.21 | <0.001 |
| <b>Race</b>                         |      |            |        |       |            |        |      |            |        |
| <b>White</b>                        | Ref  | Ref        | Ref    | Ref   | Ref        | Ref    | Ref  | Ref        | Ref    |
| <b>Black</b>                        | 1.04 | 0.96, 1.13 | 0.38   | 1.17  | 1.02, 1.34 | 0.021  | 1.80 | 1.74, 1.87 | <0.001 |
| <b>Other</b>                        | 0.80 | 0.70, 0.92 | 0.001  | 0.78  | 0.60, 1.02 | 0.066  | 0.93 | 0.87, 1.00 | 0.039  |
| <b>Year of Admission</b>            |      |            |        |       |            |        |      |            |        |
| <b>2010</b>                         | Ref  | Ref        | Ref    | Ref   | Ref        | Ref    | Ref  | Ref        | Ref    |
| <b>2011</b>                         | 1.01 | 0.94, 1.09 | 0.76   | 1.26  | 1.08, 1.48 | 0.004  | 0.96 | 0.92, 0.99 | 0.018  |
| <b>2012</b>                         | 1.01 | 0.94, 1.09 | 0.77   | 1.70  | 1.47, 1.97 | <0.001 | 0.98 | 0.94, 1.02 | 0.261  |
| <b>2013</b>                         | 1.01 | 0.94, 1.08 | 0.86   | 1.64  | 1.42, 1.90 | <0.001 | 0.85 | 0.82, 0.88 | <0.001 |
| <b>2014</b>                         | 1.26 | 1.18, 1.35 | <0.001 | 2.09  | 1.82, 2.41 | <0.001 | 0.48 | 0.46, 0.50 | <0.001 |
| <b>Source of payment for stay</b>   |      |            |        |       |            |        |      |            |        |
| <b>Commercial</b>                   | Ref  | Ref        | Ref    | Ref   | Ref        | Ref    | Ref  | Ref        | Ref    |
| <b>Medicare</b>                     | 0.92 | 0.86, 0.98 | 0.009  | 1.42  | 1.29, 1.56 | <0.001 | 1.28 | 1.24, 1.32 | <0.001 |
| <b>Medicaid</b>                     | 1.15 | 1.06, 1.24 | 0.001  | 1.58  | 1.29, 1.92 | <0.001 | 1.71 | 1.65, 1.77 | <0.001 |
| <b>Other</b>                        | 0.91 | 0.83, 1.00 | 0.045  | 1.33  | 1.08, 1.65 | 0.008  | 1.08 | 1.03, 1.13 | 0.002  |
| <b>Elixhauser Comorbidity Index</b> | 0.98 | 0.95, 1.02 | 0.28   | 1.56  | 1.51, 1.62 | <0.001 | 1.21 | 1.19, 1.23 | <0.001 |
| <b>Hospitalization Type</b>         |      |            |        |       |            |        |      |            |        |
| <b>Medical admission only</b>       | Ref  | Ref        | Ref    | Ref   | Ref        | Ref    | Ref  | Ref        | Ref    |
| <b>Medical w/ ICU</b>               | 0.95 | 0.87, 1.04 | 0.27   | 1.30  | 1.18, 1.45 | <0.001 | 0.90 | 0.87, 0.94 | <0.001 |
| <b>Surgical admission only</b>      | 1.23 | 1.17, 1.29 | <0.001 | 0.63  | 0.57, 0.70 | <0.001 | 0.86 | 0.84, 0.89 | <0.001 |
| <b>Surgical w/ ICU</b>              | 1.13 | 1.04, 1.24 | 0.007  | 0.82  | 0.72, 0.93 | 0.002  | 0.84 | 0.80, 0.88 | <0.001 |
| <b>Length of Stay</b>               |      |            |        |       |            |        |      |            |        |
| <b>1-4 days</b>                     | Ref  | Ref        | Ref    | Ref   | Ref        | Ref    | Ref  | Ref        | Ref    |
| <b>5-7 days</b>                     | 1.13 | 1.08, 1.19 | <0.001 | 1.70  | 1.56, 1.86 | <0.001 | 1.37 | 1.33, 1.40 | <0.001 |
| <b>8+ days</b>                      | 0.99 | 0.92, 1.07 | 0.77   | 2.97  | 2.68, 3.28 | <0.001 | 1.69 | 1.63, 1.75 | <0.001 |
| <b>HCUP CCS</b>                     |      |            |        |       |            |        |      |            |        |

|                                                  |      |            |        |      |            |        |      |            |        |
|--------------------------------------------------|------|------------|--------|------|------------|--------|------|------------|--------|
| <b>Cardiovascular Conditions</b>                 | Ref  | Ref        | Ref    | Ref  | Ref        | Ref    | Ref  | Ref        | Ref    |
| <b>Respiratory Conditions</b>                    | 1.23 | 1.10, 1.37 | <0.001 | 1.78 | 1.57, 2.01 | <0.001 | 1.39 | 1.32, 1.46 | <0.001 |
| <b>Gastrointestinal Conditions</b>               | 0.99 | 0.91, 1.08 | 0.81   | 1.01 | 0.87, 1.16 | 0.94   | 1.18 | 1.13, 1.23 | <0.001 |
| <b>Oncologic Conditions</b>                      | 1.11 | 1.03, 1.20 | 0.010  | 2.97 | 2.66, 3.31 | <0.001 | 1.04 | 1.00, 1.09 | 0.038  |
| <b>Genitourinary/Maternal Health Conditions</b>  | 0.91 | 0.84, 1.00 | 0.048  | 1.24 | 1.07, 1.45 | 0.005  | 0.92 | 0.88, 0.96 | <0.001 |
| <b>Neurological and Mental Health Conditions</b> | 1.06 | 0.94, 1.20 | 0.31   | 1.23 | 1.02, 1.47 | 0.027  | 1.06 | 1.00, 1.11 | 0.052  |
| <b>Musculoskeletal, Trauma, and Orthopedic</b>   | 1.22 | 1.14, 1.30 | <0.001 | 0.81 | 0.71, 0.92 | <.01   | 0.77 | 0.74, 0.80 | <0.001 |
| <b>Endocrine &amp; Hematologic Conditions</b>    | 0.78 | 0.70, 0.87 | <0.001 | 1.14 | 0.94, 1.37 | 0.179  | 1.02 | 0.97, 1.07 | 0.40   |
| <b>Other</b>                                     | 1.02 | 0.93, 1.11 | 0.68   | 1.20 | 1.05, 1.38 | 0.009  | 1.00 | 0.96, 1.04 | 0.91   |
| <b>Comorbidities</b>                             |      |            |        |      |            |        |      |            |        |
| <b>Musculoskeletal Pain</b>                      | 1.54 | 1.47, 1.61 | <0.001 | 1.03 | 0.95, 1.10 | 0.51   | 1.05 | 1.02, 1.07 | 0.001  |
| <b>Depression</b>                                | 1.27 | 1.19, 1.36 | <0.001 | 0.95 | 0.86, 1.05 | 0.31   | 1.05 | 1.01, 1.09 | 0.009  |
| <b>Other Mental Disorders</b>                    | 0.67 | 0.55, 0.82 | <0.001 | 2.83 | 2.51, 3.19 | <0.001 | 1.42 | 1.33, 1.53 | <0.001 |
| <b>Alcohol Use Disorder</b>                      | 0.87 | 0.68, 1.11 | 0.26   | 1.03 | 0.74, 1.42 | 0.86   | 1.06 | 0.95, 1.19 | 0.31   |
| <b>Drug Dependence</b>                           | 1.61 | 1.26, 2.05 | <0.001 | 0.75 | 0.38, 1.49 | 0.41   | 1.49 | 1.33, 1.67 | <0.001 |
| <b>Opioid Poisoning (incl. accidental)</b>       | 1.37 | 0.69, 2.74 | 0.37   | 3.38 | 1.16, 9.91 | 0.026  | 0.92 | 0.60, 1.41 | 0.70   |
| <b>History of Benzodiazepine Use</b>             | 1.17 | 1.11, 1.25 | <0.001 | 1.70 | 1.56, 1.84 | <0.001 | 1.34 | 1.30, 1.38 | <0.001 |

Includes 182,917 cases with complete data from 191,249 inpatient stays of previously opioid-naive patients.

Relative risk ratios estimated against a reference group with no outpatient opioid use, no death, and no readmission within 365 days of discharge.



**Supplement Table 4. Relative risk ratios from full multinomial model for outpatient reported opioid use at 90 days after discharge, among patients receiving inpatient opioids who were previously opioid naïve**

| Model - Multinomial Regression,<br>Robust SE Clustered by Patient         | Outcome 1: Outpatient use in 90-<br>Day |            |         | Outcome 2: 90-Day Mortality |            |         | Outcome 3: 90-Day Readmission |            |         |
|---------------------------------------------------------------------------|-----------------------------------------|------------|---------|-----------------------------|------------|---------|-------------------------------|------------|---------|
|                                                                           | Relative<br>Risk<br>Ratio               | 95% CI     | P-Value | Relative<br>Risk<br>Ratio   | 95% CI     | P-Value | Relative<br>Risk<br>Ratio     | 95% CI     | P-Value |
| <b>Covariates of Interest</b>                                             |                                         |            |         |                             |            |         |                               |            |         |
| <b>Proportion of stay with opiates (days of opiates / length of stay)</b> |                                         |            |         |                             |            |         |                               |            |         |
| <b>1-25%</b>                                                              | ref                                     | ref        | ref     | ref                         | ref        | ref     | ref                           | ref        | ref     |
| <b>26-50%</b>                                                             | 1.02                                    | 0.90, 1.16 | 0.730   | 0.67                        | 0.54, 0.84 | <0.001  | 0.92                          | 0.87, 0.98 | 0.010   |
| <b>51-75%</b>                                                             | 1.21                                    | 1.07, 1.38 | 0.003   | 0.5                         | 0.38, 0.65 | <0.001  | 0.94                          | 0.88, 1.00 | 0.049   |
| <b>76-100%</b>                                                            | 1.25                                    | 1.09, 1.43 | 0.002   | 0.44                        | 0.34, 0.59 | <0.001  | 1.13                          | 1.05, 1.21 | <0.001  |
| <b>Length of time between last opiate &amp;<br/>discharge</b>             |                                         |            |         |                             |            |         |                               |            |         |
| <b>&gt;24 Hours</b>                                                       | ref                                     | ref        | ref     | ref                         | ref        | ref     | ref                           | ref        | ref     |
| <b>13-24 Hours</b>                                                        | 1.43                                    | 1.28, 1.60 | <0.001  | 1.90                        | 1.46, 2.49 | <0.001  | 1.06                          | 1.00, 1.12 | 0.060   |
| <b>0-12 Hours</b>                                                         | 2.02                                    | 1.83, 2.23 | <0.001  | 4.22                        | 3.34, 5.35 | <0.001  | 1.03                          | 0.98, 1.08 | 0.310   |
| <b>Location of First Opiate</b>                                           |                                         |            |         |                             |            |         |                               |            |         |
| <b>Stepdown/Ward</b>                                                      | ref                                     | ref        | ref     | ref                         | ref        | ref     | ref                           | ref        | ref     |
| <b>ED</b>                                                                 | 1.05                                    | 0.96, 1.15 | 0.280   | 1.09                        | 0.88, 1.35 | 0.440   | 1.18                          | 1.12, 1.24 | <0.001  |
| <b>ICU</b>                                                                | 1.04                                    | 0.90, 1.19 | 0.630   | 0.58                        | 0.46, 0.74 | <0.001  | 0.9                           | 0.83, 0.98 | 0.011   |
| <b>PACU/Procedure Unit</b>                                                | 0.94                                    | 0.87, 1.01 | 0.084   | 0.14                        | 0.09, 0.24 | <0.001  | 0.72                          | 0.69, 0.76 | <0.001  |
| <b>Inpatient Use of Non-Opioid<br/>Painkiller</b>                         | 1.07                                    | 1.01, 1.15 | 0.034   | 0.92                        | 0.79, 1.07 | 0.300   | 1.03                          | 0.99, 1.07 | 0.147   |
| <b>Additional Covariates Included in<br/>Model</b>                        |                                         |            |         |                             |            |         |                               |            |         |
| <b>Hospital</b>                                                           |                                         |            |         |                             |            |         |                               |            |         |
| <b>1</b>                                                                  | ref                                     | ref        | ref     | ref                         | ref        | ref     | ref                           | ref        | ref     |

|                           |      |            |        |       |                |        |      |            |        |
|---------------------------|------|------------|--------|-------|----------------|--------|------|------------|--------|
| <b>2</b>                  | 1.48 | 1.33, 1.65 | <0.001 | 1.97  | 1.30, 3.01     | 0.002  | 1.46 | 1.37, 1.55 | <0.001 |
| <b>3</b>                  | 1.15 | 1.02, 1.30 | 0.024  | 2.47  | 1.60, 3.81     | <0.001 | 1.42 | 1.32, 1.52 | <0.001 |
| <b>4</b>                  | 1.25 | 1.10, 1.40 | <0.001 | 1.77  | 1.12, 2.80     | 0.014  | 1.31 | 1.22, 1.41 | <0.001 |
| <b>5</b>                  | 1.89 | 1.67, 2.13 | <0.001 | 2.72  | 1.74, 4.25     | <0.001 | 1.28 | 1.18, 1.38 | <0.001 |
| <b>6</b>                  | 1.12 | 0.97, 1.29 | 0.126  | 1.68  | 1.08, 2.63     | 0.023  | 1.29 | 1.19, 1.40 | <0.001 |
| <b>7</b>                  | 2.01 | 1.76, 2.30 | <0.001 | 2.00  | 1.17, 3.43     | 0.011  | 1.76 | 1.60, 1.93 | <0.001 |
| <b>8</b>                  | 1.17 | 0.91, 1.50 | 0.23   | 2.90  | 1.76, 4.80     | <0.001 | 1.28 | 1.13, 1.45 | <0.001 |
| <b>9</b>                  | 1.55 | 1.30, 1.85 | <0.001 | 3.61  | 2.16, 6.03     | <0.001 | 1.36 | 1.21, 1.52 | <0.001 |
| <b>10</b>                 | 1.55 | 1.25, 1.92 | <0.001 | 2.69  | 1.52, 4.77     | 0.001  | 1.38 | 1.21, 1.57 | <0.001 |
| <b>11</b>                 | 1.79 | 1.48, 2.17 | <0.001 | 2.90  | 1.68, 5.01     | <0.001 | 1.67 | 1.46, 1.91 | <0.001 |
| <b>12</b>                 | 1.27 | 0.86, 1.87 | 0.24   | 3.90  | 1.89, 8.05     | <0.001 | 1.82 | 1.48, 2.23 | <0.001 |
| <b>Length of Stay</b>     |      |            |        |       |                |        |      |            |        |
| <b>1-4 days</b>           | ref  | ref        | ref    | ref   | ref            | ref    | ref  | ref        | ref    |
| <b>5-7 days</b>           | 1.23 | 1.14, 1.33 | <0.001 | 1.54  | 1.23, 1.92     | <0.001 | 1.26 | 1.20, 1.32 | <0.001 |
| <b>8+ days</b>            | 1.14 | 1.03, 1.27 | 0.012  | 2.83  | 2.24, 3.57     | <0.001 | 1.75 | 1.65, 1.86 | <0.001 |
| <b>Age</b>                |      |            |        |       |                |        |      |            |        |
| <b>18-24</b>              | ref  | ref        | ref    | ref   | ref            | ref    | ref  | ref        | ref    |
| <b>25-34</b>              | 1.15 | 1.00, 1.33 | 0.055  | 0.96  | 0.17, 5.26     | 0.96   | 0.79 | 0.73, 0.85 | <0.001 |
| <b>35-44</b>              | 1.49 | 1.27, 1.74 | <0.001 | 3.55  | 0.80,<br>15.75 | 0.095  | 0.90 | 0.83, 0.97 | 0.009  |
| <b>45-54</b>              | 1.83 | 1.57, 2.15 | <0.001 | 5.54  | 1.32,<br>23.33 | 0.019  | 0.91 | 0.84, 0.99 | 0.033  |
| <b>55-64</b>              | 1.69 | 1.45, 1.98 | <0.001 | 7.40  | 1.78,<br>30.82 | 0.006  | 0.89 | 0.82, 0.97 | 0.006  |
| <b>64-74</b>              | 1.65 | 1.40, 1.96 | <0.001 | 14.42 | 3.44,<br>60.51 | <0.001 | 0.84 | 0.77, 0.93 | <0.001 |
| <b>75+</b>                | 1.35 | 1.13, 1.61 | 0.001  | 44.94 | 10.74,<br>188. | <0.001 | 0.92 | 0.84, 1.01 | 0.097  |
| <b>Sex (ref = female)</b> | 0.93 | 0.87, 1.00 | 0.041  | 1.18  | 1.02, 1.36     | 0.029  | 1.12 | 1.08, 1.17 | <0.001 |
| <b>Race</b>               |      |            |        |       |                |        |      |            |        |

|                                                  |      |            |        |      |            |        |      |            |        |
|--------------------------------------------------|------|------------|--------|------|------------|--------|------|------------|--------|
| <b>White</b>                                     | ref  | ref        | ref    | ref  | ref        | ref    | ref  | ref        | ref    |
| <b>Black</b>                                     | 0.85 | 0.75, 0.95 | 0.004  | 1.04 | 0.79, 1.38 | 0.77   | 1.40 | 1.32, 1.47 | <0.001 |
| <b>Other</b>                                     | 0.82 | 0.68, 0.98 | 0.032  | 0.49 | 0.25, 1.00 | 0.049  | 1.04 | 0.93, 1.15 | 0.49   |
| <b>Year of Admission</b>                         |      |            |        |      |            |        |      |            |        |
| <b>2010</b>                                      | ref  | ref        | ref    | ref  | ref        | ref    | ref  | ref        | ref    |
| <b>2011</b>                                      | 1.09 | 0.98, 1.22 | 0.103  | 1.90 | 1.31, 2.74 | 0.001  | 0.94 | 0.88, 1.00 | 0.048  |
| <b>2012</b>                                      | 1.19 | 1.07, 1.32 | 0.001  | 2.73 | 1.92, 3.86 | <0.001 | 1.05 | 0.99, 1.11 | 0.132  |
| <b>2013</b>                                      | 1.28 | 1.15, 1.41 | <0.001 | 2.84 | 2.01, 4.00 | <0.001 | 0.89 | 0.84, 0.95 | <0.001 |
| <b>2014</b>                                      | 1.69 | 1.53, 1.86 | <0.001 | 3.35 | 2.38, 4.72 | <.01   | 0.84 | 0.79, 0.90 | <0.001 |
| <b>Source of payment for stay</b>                |      |            |        |      |            |        |      |            |        |
| <b>Commercial</b>                                | ref  | ref        | ref    | ref  | ref        | ref    | ref  | ref        | ref    |
| <b>Medicare</b>                                  | 0.91 | 0.83, 0.99 | 0.024  | 1.15 | 0.95, 1.39 | 0.164  | 1.19 | 1.13, 1.26 | <0.001 |
| <b>Medicaid</b>                                  | 1.03 | 0.93, 1.14 | 0.57   | 1.49 | 1.00, 2.21 | 0.048  | 1.49 | 1.41, 1.57 | <0.001 |
| <b>Other</b>                                     | 0.97 | 0.86, 1.10 | 0.66   | 1.11 | 0.68, 1.80 | 0.69   | 1.10 | 1.02, 1.19 | 0.016  |
| <b>Elixhauser Comorbidity Index</b>              | 0.94 | 0.89, 0.98 | 0.006  | 1.61 | 1.50, 1.72 | <0.001 | 1.15 | 1.12, 1.18 | <0.001 |
| <b>Hospitalization Type</b>                      |      |            |        |      |            |        |      |            |        |
| <b>Medical admission only</b>                    | ref  | ref        | ref    | ref  | ref        | ref    | ref  | ref        | ref    |
| <b>Medical w/ ICU</b>                            | 1.00 | 0.86, 1.17 | 0.99   | 2.16 | 1.70, 2.74 | <0.001 | 1.02 | 0.94, 1.11 | 0.59   |
| <b>Surgical admission only</b>                   | 1.25 | 1.16, 1.34 | <0.001 | 0.64 | 0.51, 0.80 | <0.001 | 1.07 | 1.02, 1.11 | 0.005  |
| <b>Surgical w/ ICU</b>                           | 1.22 | 1.07, 1.40 | 0.004  | 1.10 | 0.85, 1.42 | 0.49   | 1.11 | 1.03, 1.20 | 0.008  |
| <b>HCUP CCS</b>                                  |      |            |        |      |            |        |      |            |        |
| <b>Cardiovascular Conditions</b>                 | ref  | ref        | ref    | ref  | ref        | ref    | ref  | ref        | ref    |
| <b>Respiratory Conditions</b>                    | 1.24 | 1.03, 1.48 | 0.022  | 2.07 | 1.59, 2.71 | <0.001 | 1.21 | 1.10, 1.33 | <0.001 |
| <b>Gastrointestinal Conditions</b>               | 0.97 | 0.86, 1.11 | 0.69   | 1.02 | 0.76, 1.37 | 0.89   | 1.09 | 1.02, 1.17 | 0.015  |
| <b>Oncologic Conditions</b>                      | 1.17 | 1.04, 1.32 | 0.009  | 2.83 | 2.24, 3.57 | <0.001 | 1.28 | 1.20, 1.37 | <0.001 |
| <b>Genitourinary/Maternal Health Conditions</b>  | 0.95 | 0.82, 1.09 | 0.42   | 1.18 | 0.80, 1.75 | 0.40   | 0.97 | 0.90, 1.05 | 0.51   |
| <b>Neurological and Mental Health Conditions</b> | 1.11 | 0.90, 1.38 | 0.32   | 1.97 | 1.25, 3.10 | 0.004  | 1.09 | 0.96, 1.23 | 0.168  |

|                                                |      |            |        |      |             |        |      |            |        |
|------------------------------------------------|------|------------|--------|------|-------------|--------|------|------------|--------|
| <b>Musculoskeletal, Trauma, and Orthopedic</b> | 1.15 | 1.03, 1.27 | 0.010  | 0.70 | 0.54, 0.92  | 0.010  | 0.81 | 0.76, 0.86 | <0.001 |
| <b>Endocrine &amp; Hematologic Conditions</b>  | 0.57 | 0.48, 0.69 | <0.001 | 1.61 | 1.04, 2.50  | 0.033  | 1.23 | 1.12, 1.34 | <0.001 |
| <b>Other</b>                                   | 1.00 | 0.88, 1.14 | 0.96   | 1.27 | 0.94, 1.71  | 0.122  | 0.97 | 0.90, 1.05 | 0.47   |
| <b>Comorbidities</b>                           |      |            |        |      |             |        |      |            |        |
| <b>Musculoskeletal Pain</b>                    | 1.42 | 1.32, 1.51 | <0.001 | 0.96 | 0.82, 1.12  | 0.61   | 1.02 | 0.98, 1.06 | 0.35   |
| <b>Depression</b>                              | 1.19 | 1.08, 1.31 | <0.001 | 0.91 | 0.75, 1.11  | 0.34   | 1.02 | 0.97, 1.08 | 0.44   |
| <b>Other Mental Disorders</b>                  | 0.87 | 0.64, 1.18 | 0.37   | 3.15 | 2.45, 4.07  | <0.001 | 1.46 | 1.28, 1.67 | <0.001 |
| <b>Alcohol Use Disorder</b>                    | 1.19 | 0.84, 1.67 | 0.32   | 0.58 | 0.29, 1.17  | 0.128  | 0.85 | 0.70, 1.04 | 0.107  |
| <b>Drug Dependence</b>                         | 1.49 | 1.04, 2.14 | 0.31   | 0.86 | 0.19, 3.93  | 0.85   | 1.40 | 1.14, 1.73 | 0.002  |
| <b>Opioid Poisoning (incl. accidental)</b>     | 1.01 | 0.30, 3.43 | 0.98   | 4.70 | 0.68, 32.24 | 0.115  | 1.09 | 0.54, 2.22 | 0.80   |
| <b>History of Benzodiazepine Use</b>           | 1.10 | 1.02, 1.20 | 0.019  | 2.19 | 1.88, 2.55  | <0.001 | 1.30 | 1.25, 1.37 | <0.001 |

Includes 87,517 cases with complete date among 92,433 stays with inpatient opioid use with a discharge (i.e., no in-hospital death).

Relative risk ratios estimated against a reference group with no outpatient opioid use, no death, and no readmission within 90 days of discharge.

**Supplement Table 5. Relative risk ratios from full multinomial for outpatient reported opioid use at 365 days after discharge, among patients receiving inpatient opioids who were previously opioid naïve**

| <b>Model - Multinomial Regression,<br/>Robust SE Clustered by Patient</b> | <b>Outcome 1: Outpatient use in<br/>365-Day</b> |               |                | <b>Outcome 2: 365-Day Mortality</b> |               |                | <b>Outcome 3: 365-Day Readmission</b> |               |                |
|---------------------------------------------------------------------------|-------------------------------------------------|---------------|----------------|-------------------------------------|---------------|----------------|---------------------------------------|---------------|----------------|
|                                                                           | <b>Relative<br/>Risk<br/>Ratio</b>              | <b>95% CI</b> | <b>P-Value</b> | <b>Relative<br/>Risk<br/>Ratio</b>  | <b>95% CI</b> | <b>P-Value</b> | <b>Relative<br/>Risk<br/>Ratio</b>    | <b>95% CI</b> | <b>P-Value</b> |
| <b>Covariates of Interest</b>                                             |                                                 |               |                |                                     |               |                |                                       |               |                |
| <b>Proportion of stay with opiates (days of opiates / length of stay)</b> |                                                 |               |                |                                     |               |                |                                       |               |                |
| <b>1-25%</b>                                                              | ref                                             | ref           | ref            | ref                                 | ref           | ref            | ref                                   | ref           | ref            |
| <b>26-50%</b>                                                             | 1.08                                            | 0.96, 1.21    | 0.187          | 0.73                                | 0.62, 0.86    | <0.001         | 0.91                                  | 0.86, 0.96    | 0.001          |
| <b>51-75%</b>                                                             | 1.27                                            | 1.12, 1.43    | <0.001         | 0.64                                | 0.53, 0.77    | <0.001         | 0.94                                  | 0.89, 1.00    | 0.049          |
| <b>76-100%</b>                                                            | 1.35                                            | 1.19, 1.54    | <0.001         | 0.65                                | 0.52, 0.80    | <0.001         | 1.14                                  | 1.07, 1.22    | <0.001         |
| <b>Length of time between last opiate &amp;<br/>discharge</b>             |                                                 |               |                |                                     |               |                |                                       |               |                |
| <b>&gt;24 Hours</b>                                                       | ref                                             | ref           | ref            | ref                                 | ref           | ref            | ref                                   | ref           | ref            |
| <b>13-24 Hours</b>                                                        | 1.31                                            | 1.18, 1.45    | <0.001         | 1.49                                | 1.24, 1.79    | <0.001         | 1.01                                  | 0.96, 1.07    | 0.670          |
| <b>0-12 Hours</b>                                                         | 1.80                                            | 1.65, 1.97    | <0.001         | 2.00                                | 1.69, 2.38    | <0.001         | 0.94                                  | 0.90, 0.99    | 0.019          |
| <b>Location of First Opiate</b>                                           |                                                 |               |                |                                     |               |                |                                       |               |                |
| <b>Stepdown/Ward</b>                                                      | ref                                             | ref           | ref            | ref                                 | ref           | ref            | ref                                   | ref           | ref            |
| <b>ED</b>                                                                 | 1.13                                            | 1.04, 1.22    | 0.004          | 1.24                                | 1.06, 1.46    | 0.007          | 1.27                                  | 1.21, 1.33    | <0.001         |
| <b>ICU</b>                                                                | 0.96                                            | 0.84, 1.10    | 0.540          | 0.65                                | 0.54, 0.78    | <0.001         | 0.8                                   | 0.74, 0.87    | <0.001         |
| <b>PACU/Procedure Unit</b>                                                | 0.91                                            | 0.85, 0.98    | 0.009          | 0.37                                | 0.30, 0.47    | <0.001         | 0.74                                  | 0.71, 0.77    | <0.001         |
| <b>Inpatient Use of Non-Opioid<br/>Painkiller</b>                         | 1.04                                            | 0.98, 1.11    | 0.168          | 0.88                                | 0.79, 0.99    | 0.029          | 1                                     | 0.96, 1.03    | 0.880          |
| <b>Additional Covariates Included in<br/>Model</b>                        |                                                 |               |                |                                     |               |                |                                       |               |                |
| <b>Hospital</b>                                                           |                                                 |               |                |                                     |               |                |                                       |               |                |
| <b>1</b>                                                                  | ref                                             | ref           | ref            | ref                                 | ref           | ref            | ref                                   | ref           | ref            |

|                           |      |            |        |       |                |        |      |            |        |
|---------------------------|------|------------|--------|-------|----------------|--------|------|------------|--------|
| <b>2</b>                  | 1.45 | 1.32, 1.60 | <0.001 | 2.15  | 1.63, 2.84     | <0.001 | 1.45 | 1.37, 1.54 | <0.001 |
| <b>3</b>                  | 1.25 | 1.12, 1.40 | <0.001 | 2.39  | 1.78, 3.19     | <0.001 | 1.60 | 1.50, 1.70 | <0.001 |
| <b>4</b>                  | 1.32 | 1.18, 1.47 | <0.001 | 1.81  | 1.33, 2.48     | <0.001 | 1.42 | 1.34, 1.51 | <0.001 |
| <b>5</b>                  | 1.89 | 1.70, 2.11 | <0.001 | 2.23  | 1.64, 3.02     | <0.001 | 1.49 | 1.39, 1.60 | <0.001 |
| <b>6</b>                  | 1.31 | 1.16, 1.48 | <0.001 | 1.49  | 1.10, 2.03     | 0.011  | 1.53 | 1.43, 1.64 | <0.001 |
| <b>7</b>                  | 2.26 | 1.99, 2.56 | <0.001 | 2.01  | 1.38, 2.94     | <0.001 | 2.30 | 2.12, 2.50 | <0.001 |
| <b>8</b>                  | 1.44 | 1.15, 1.78 | 0.001  | 2.79  | 1.94, 4.01     | <0.001 | 1.59 | 1.42, 1.79 | <0.001 |
| <b>9</b>                  | 1.85 | 1.58, 2.18 | <0.001 | 3.51  | 2.45, 5.03     | <0.001 | 1.89 | 1.71, 2.08 | <0.001 |
| <b>10</b>                 | 1.64 | 1.34, 2.00 | <0.001 | 2.72  | 1.81, 4.10     | <0.001 | 1.73 | 1.54, 1.94 | <0.001 |
| <b>11</b>                 | 1.97 | 1.65, 2.35 | <0.001 | 2.01  | 1.31, 3.07     | 0.001  | 1.96 | 1.73, 2.22 | <0.001 |
| <b>12</b>                 | 1.46 | 1.01, 2.10 | 0.042  | 3.43  | 1.92, 6.11     | <0.001 | 2.37 | 1.97, 2.85 | <0.001 |
| <b>Length of Stay</b>     |      |            |        |       |                |        |      |            |        |
| <b>1-4 days</b>           | ref  | ref        | ref    | ref   | ref            | ref    | ref  | ref        | ref    |
| <b>5-7 days</b>           | 1.20 | 1.12, 1.29 | <0.001 | 1.42  | 1.21, 1.66     | <0.001 | 1.19 | 1.14, 1.24 | <0.001 |
| <b>8+ days</b>            | 1.20 | 1.08, 1.32 | <0.001 | 2.79  | 2.35, 3.31     | <0.001 | 1.65 | 1.56, 1.74 | <0.001 |
| <b>Age</b>                |      |            |        |       |                |        |      |            |        |
| <b>18-24</b>              | ref  | ref        | ref    | ref   | ref            | ref    | ref  | ref        | ref    |
| <b>25-34</b>              | 1.16 | 1.02, 1.33 | 0.028  | 0.84  | 0.32, 2.24     | 0.73   | 0.66 | 0.62, 0.70 | <0.001 |
| <b>35-44</b>              | 1.55 | 1.34, 1.80 | <0.001 | 2.25  | 0.93, 5.43     | 0.072  | 0.69 | 0.65, 0.74 | <0.001 |
| <b>45-54</b>              | 1.98 | 1.71, 2.29 | <0.001 | 4.99  | 2.16,<br>11.50 | <0.001 | 0.75 | 0.69, 0.80 | <0.001 |
| <b>55-64</b>              | 1.83 | 1.58, 2.11 | <0.001 | 6.27  | 2.73,<br>14.38 | <0.001 | 0.73 | 0.68, 0.78 | <0.001 |
| <b>64-74</b>              | 1.86 | 1.59, 2.18 | <0.001 | 9.40  | 4.06,<br>21.75 | <0.001 | 0.71 | 0.65, 0.77 | <0.001 |
| <b>75+</b>                | 1.54 | 1.30, 1.82 | <0.001 | 24.80 | 10.76,<br>57.4 | <0.001 | 0.78 | 0.72, 0.85 | <0.001 |
| <b>Sex (ref = female)</b> | 0.94 | 0.89, 1.00 | 0.067  | 1.27  | 1.14, 1.42     | <0.001 | 1.13 | 1.09, 1.18 | <0.001 |
| <b>Race</b>               |      |            |        |       |                |        |      |            |        |
| <b>White</b>              | ref  | ref        | ref    | ref   | ref            | ref    | ref  | ref        | ref    |

|                                                  |      |            |        |      |            |        |      |            |        |
|--------------------------------------------------|------|------------|--------|------|------------|--------|------|------------|--------|
| <b>Black</b>                                     | 1.02 | 0.92, 1.14 | 0.64   | 1.22 | 0.99, 1.50 | 0.060  | 1.79 | 1.70, 1.88 | <0.001 |
| <b>Other</b>                                     | 0.82 | 0.69, 0.97 | 0.019  | 0.71 | 0.47, 1.08 | 0.109  | 0.96 | 0.87, 1.05 | 0.344  |
| <b>Year of Admission</b>                         |      |            |        |      |            |        |      |            |        |
| <b>2010</b>                                      | ref  | ref        | ref    | ref  | ref        | ref    | ref  | ref        | ref    |
| <b>2011</b>                                      | 1.01 | 0.92, 1.12 | 0.77   | 1.46 | 1.15, 1.86 | 0.002  | 0.96 | 0.91, 1.02 | 0.164  |
| <b>2012</b>                                      | 1.04 | 0.95, 1.15 | 0.37   | 1.77 | 1.41, 2.23 | <0.001 | 0.95 | 0.90, 1.00 | 0.070  |
| <b>2013</b>                                      | 1.08 | 0.99, 1.19 | 0.087  | 1.86 | 1.48, 2.33 | <0.001 | 0.81 | 0.77, 0.86 | <0.001 |
| <b>2014</b>                                      | 1.31 | 1.19, 1.43 | <0.001 | 2.14 | 1.71, 2.67 | <0.001 | 0.48 | 0.45, 0.50 | <0.001 |
| <b>Source of payment for stay</b>                |      |            |        |      |            |        |      |            |        |
| <b>Commercial</b>                                | ref  | ref        | ref    | ref  | ref        | ref    | ref  | ref        | ref    |
| <b>Medicare</b>                                  | 0.91 | 0.84, 0.98 | 0.018  | 1.39 | 1.21, 1.61 | <0.001 | 1.24 | 1.18, 1.31 | <0.001 |
| <b>Medicaid</b>                                  | 1.11 | 1.01, 1.22 | 0.031  | 1.52 | 1.17, 2.02 | 0.002  | 1.68 | 1.60, 1.77 | <0.001 |
| <b>Other</b>                                     | 0.92 | 0.82, 1.03 | 0.138  | 1.26 | 0.93, 1.72 | 0.139  | 1.08 | 1.01, 1.16 | 0.019  |
| <b>Elixhauser Comorbidity Index</b>              | 0.96 | 0.92, 1.01 | 0.087  | 1.55 | 1.47, 1.64 | <0.001 | 1.18 | 1.15, 1.21 | <0.001 |
| <b>Hospitalization Type</b>                      |      |            |        |      |            |        |      |            |        |
| <b>Medical admission only</b>                    | ref  | ref        | ref    | ref  | ref        | ref    | ref  | ref        | ref    |
| <b>Medical w/ ICU</b>                            | 0.98 | 0.85, 1.14 | 0.81   | 1.77 | 1.46, 2.15 | <0.001 | 1.02 | 0.94, 1.11 | 0.58   |
| <b>Surgical admission only</b>                   | 1.18 | 1.10, 1.26 | <0.001 | 0.73 | 0.62, 0.85 | <0.001 | 0.99 | 0.95, 1.03 | 0.64   |
| <b>Surgical w/ ICU</b>                           | 1.07 | 0.94, 1.22 | 0.295  | 1.07 | 0.88, 1.30 | 0.48   | 1.02 | 0.95, 1.10 | 0.61   |
| <b>HCUP CCS</b>                                  |      |            |        |      |            |        |      |            |        |
| <b>Cardiovascular Conditions</b>                 | ref  | ref        | ref    | ref  | ref        | ref    | ref  | ref        | ref    |
| <b>Respiratory Conditions</b>                    | 1.28 | 1.08, 1.51 | 0.005  | 2.34 | 1.88, 2.92 | <0.001 | 1.49 | 1.36, 1.64 | <0.001 |
| <b>Gastrointestinal Conditions</b>               | 0.94 | 0.84, 1.05 | 0.29   | 0.94 | 0.75, 1.17 | 0.58   | 1.10 | 1.03, 1.17 | 0.004  |
| <b>Oncologic Conditions</b>                      | 1.03 | 0.93, 1.15 | 0.56   | 3.35 | 2.82, 3.98 | <0.001 | 1.14 | 1.07, 1.21 | <0.001 |
| <b>Genitourinary/Maternal Health Conditions</b>  | 0.84 | 0.74, 0.95 | 0.006  | 1.29 | 0.97, 1.72 | 0.085  | 0.89 | 0.83, 0.95 | 0.001  |
| <b>Neurological and Mental Health Conditions</b> | 1.21 | 0.99, 1.47 | 0.057  | 2.02 | 1.41, 2.89 | <0.001 | 1.20 | 1.07, 1.35 | 0.002  |
| <b>Musculoskeletal, Trauma, and Orthopedic</b>   | 1.12 | 1.02, 1.23 | 0.016  | 0.82 | 0.68, 1.00 | 0.050  | 0.81 | 0.76, 0.85 | <0.001 |

|                                               |      |            |        |      |             |        |      |            |        |
|-----------------------------------------------|------|------------|--------|------|-------------|--------|------|------------|--------|
| <b>Endocrine &amp; Hematologic Conditions</b> | 0.65 | 0.55, 0.76 | <0.001 | 1.39 | 0.99, 1.95  | 0.059  | 1.09 | 1.01, 1.18 | 0.036  |
| <b>Other</b>                                  | 0.98 | 0.87, 1.10 | 0.75   | 1.26 | 1.00, 1.59  | 0.049  | 0.96 | 0.90, 1.02 | 0.183  |
| <b>Comorbidities</b>                          |      |            |        |      |             |        |      |            |        |
| <b>Musculoskeletal Pain</b>                   | 1.44 | 1.35, 1.53 | <0.001 | 1.00 | 0.89, 1.13  | 0.94   | 1.06 | 1.02, 1.10 | 0.004  |
| <b>Depression</b>                             | 1.29 | 1.18, 1.40 | <0.001 | 1.01 | 0.87, 1.17  | 0.89   | 1.06 | 1.00, 1.12 | 0.035  |
| <b>Other Mental Disorders</b>                 | 0.75 | 0.55, 1.04 | 0.083  | 2.99 | 2.39, 3.74  | <0.001 | 1.62 | 1.41, 1.86 | <0.001 |
| <b>Alcohol Use Disorder</b>                   | 1.12 | 0.80, 1.57 | 0.51   | 1.02 | 0.61, 1.71  | 0.94   | 1.05 | 0.86, 1.28 | 0.65   |
| <b>Drug Dependence</b>                        | 1.86 | 1.32, 2.62 | <0.001 | 1.34 | 0.47, 3.81  | 0.58   | 1.80 | 1.45, 2.23 | <0.001 |
| <b>Opioid Poisoning (incl. accidental)</b>    | 1.59 | 0.60, 4.24 | 0.35   | 2.37 | 0.41, 13.77 | 0.34   | 0.87 | 0.41, 1.83 | 0.71   |
| <b>History of Benzodiazepine Use</b>          | 1.23 | 1.14, 1.33 | <0.001 | 1.80 | 1.60, 2.02  | <0.001 | 1.35 | 1.29, 1.41 | <0.001 |

Includes 87,517 cases with complete date among 92,433 stays with inpatient opioid use with a discharge (i.e., no in-hospital death).

Relative risk ratios estimated against a reference group with no outpatient opioid use, no death, and no readmission within 365 days of discharge.



**Supplement Table 6. Sensitivity analysis of the association between any inpatient opioid use and outpatient opioid use, mortality and readmission at 90 and 365 days post-discharge, after removal of stays for trauma/orthopedic, or oncological conditions**

| Outcomes                                | Percentages (95% CI) with outcome |                      | Percentage Point Difference in Use (95% CI) |
|-----------------------------------------|-----------------------------------|----------------------|---------------------------------------------|
|                                         | No Inpatient Use                  | Inpatient Opioid Use |                                             |
| <b>At 90 days post-discharge</b>        |                                   |                      |                                             |
| <b>Outpatient Reported Use</b>          | 2.8 (2.6, 2.9)                    | 5.6 (5.4, 5.8)       | +2.8 (2.6, 3.0)                             |
| No Outpatient Use/Mortality/Readmission | 76.0 (75.7, 76.4)                 | 73.3 (72.9, 73.7)    | -2.7 (-3.1, -2.3)                           |
| Mortality                               | 0.1 (0.1, 0.2)                    | 0.2 (0.2, 0.3)       | +0.1 (0.0, 0.1)                             |
| Readmission                             | 21.1 (20.8, 21.4)                 | 20.9 (20.6, 21.2)    | -0.2 (-0.5, +0.1)                           |
| <b>At 365-days post-discharge</b>       |                                   |                      |                                             |
| <b>Outpatient Reported Use</b>          | 4.2 (4.1, 4.4)                    | 7.4 (7.1, 7.6)       | +3.2 (2.9, 3.4)                             |
| No Outpatient Use/Mortality/Readmission | 55.7 (55.3, 56.1)                 | 53.5 (53.1, 54.0)    | -2.2 (-2.6, -1.7)                           |
| Mortality                               | 0.5 (0.4, 0.5)                    | 0.5 (0.5, 0.6)       | +0.0 (-0.1, 0.1)                            |
| Readmission                             | 39.7 (39.3, 40.0)                 | 38.6 (38.2, 39.0)    | -1.1 (-1.5, -0.7)                           |

**Notes:**

(B) includes 150,905 previously opioid-naïve patient with 157,963 stays.

**Supplement Table 7. Sensitivity analysis of the association between patterns of inpatient opioid administration and outpatient opioid use at 90 and 365 days after discharge among patients receiving inpatient opioids, after removal of stays for trauma/orthopedic, or oncological conditions**

| <b>Inpatient opioid use patterns</b>                     | <b>within 90 days of discharge</b>                 |                                                               | <b>within 365 days of discharge</b>                |                                                               |
|----------------------------------------------------------|----------------------------------------------------|---------------------------------------------------------------|----------------------------------------------------|---------------------------------------------------------------|
|                                                          | <b>Percent with outpatient opioid use (95% CI)</b> | <b>Percentage Point Difference in outpatient use (95% CI)</b> | <b>Percent with outpatient opioid use (95% CI)</b> | <b>Percentage Point Difference in outpatient use (95% CI)</b> |
| <b>Proportion of stay with opioids</b>                   |                                                    |                                                               |                                                    |                                                               |
| 1-25%                                                    | 5.2 (4.6, 5.8)                                     | Ref                                                           | 6.4 (5.8, 7.1)                                     | Ref                                                           |
| 26-50%                                                   | 5.1 (4.8, 5.5)                                     | -0.1 (-0.7, 0.5)                                              | 7.1 (6.7, 7.5)                                     | +0.7 (0.1, 1.4)                                               |
| 51-75%                                                   | 6.3 (5.9, 6.6)                                     | +1.1 (0.5, 1.7)                                               | 8.3 (7.9, 8.7)                                     | +1.9 (1.3, 2.6)                                               |
| 76-100%                                                  | 5.9 (5.4, 6.3)                                     | +0.7 (0.1, 1.3)                                               | 7.9 (7.3, 8.4)                                     | +1.5 (0.9, 2.2)                                               |
| <b>Time from last opioid administration to discharge</b> |                                                    |                                                               |                                                    |                                                               |
| >24 Hours                                                | 3.7 (3.3, 4.0)                                     | Ref                                                           | 5.3 (4.9, 5.7)                                     | Ref                                                           |
| 13-24 Hours                                              | 5.3 (4.8, 5.8)                                     | +1.6 (1.1, 2.1)                                               | 6.9 (6.3, 7.4)                                     | +1.6 (1.0, 2.1)                                               |
| 0-12 Hours                                               | 7.0 (6.7, 7.4)                                     | +3.3 (2.9, 3.7)                                               | 9.1 (8.7, 9.5)                                     | +3.8 (3.4, 4.2)                                               |
| <b>Setting to first receive opioids</b>                  |                                                    |                                                               |                                                    |                                                               |
| Stepdown/Ward                                            | 5.6 (5.3, 5.9)                                     | Ref                                                           | 7.4 (7.0, 7.7)                                     | Ref                                                           |
| ED                                                       | 5.7 (5.2, 6.2)                                     | +0.1 (-0.4, 0.6)                                              | 7.7 (7.1, 8.3)                                     | +0.3 (-0.3, 0.9)                                              |
| ICU                                                      | 6.1 (5.3, 7.0)                                     | +0.5 (-0.3, 1.4)                                              | 8.0 (6.9, 9.1)                                     | +0.6 (-0.5, 1.7)                                              |
| PACU/Procedure Unit                                      | 5.7 (5.3, 6.1)                                     | +0.1 (-0.3, 0.5)                                              | 7.7 (7.3, 8.2)                                     | +0.3 (-0.1, 0.8)                                              |
| <b>Any inpatient use of non-opioid pain medicine</b>     |                                                    |                                                               |                                                    |                                                               |
| None                                                     | 5.6 (5.4, 5.8)                                     | Ref                                                           | 7.5 (7.2, 7.8)                                     | Ref                                                           |
| Received >= 1 time during stay                           | 6.0 (5.6, 6.4)                                     | +0.4 (0.0, 0.8)                                               | 8.0 (7.5, 8.4)                                     | +0.5 (0.0, 0.9)                                               |

(B) includes 63,607 patients with 67,356 stays.

**Supplement Table 8. Descriptive characteristics of opioid naive inpatient discharges, by hospital**

|                                              | <b>Overall<br/>; N =<br/>191,249</b> | <b>Hosp<br/>1; N =<br/>42,456<br/>(22.2%)</b> | <b>Hosp<br/>2; N =<br/>38,950<br/>(20.4%)</b> | <b>Hosp<br/>3; N =<br/>27,064<br/>(14.2%)</b> | <b>Hosp<br/>4; N =<br/>19,859<br/>(10.4%)</b> | <b>Hosp<br/>5; N =<br/>16,952<br/>(8.9%)</b> | <b>Hosp<br/>6; N =<br/>15,277<br/>(8.0%)</b> | <b>Hosp<br/>7; N =<br/>8,663<br/>(4.5%)</b> | <b>Hosp<br/>8; N =<br/>6,042<br/>(3.2%)</b> | <b>Hosp<br/>9; N =<br/>5,829<br/>(3.1%)</b> | <b>Hosp<br/>10; N<br/>= 4,680<br/>(2.5%)</b> | <b>Hosp<br/>11; N<br/>= 3,903<br/>(2.0%)</b> | <b>Hosp<br/>12; N<br/>= 1,574<br/>(0.8%)</b> |
|----------------------------------------------|--------------------------------------|-----------------------------------------------|-----------------------------------------------|-----------------------------------------------|-----------------------------------------------|----------------------------------------------|----------------------------------------------|---------------------------------------------|---------------------------------------------|---------------------------------------------|----------------------------------------------|----------------------------------------------|----------------------------------------------|
| <b>Years for data</b>                        |                                      | 2010-<br>14                                   | 2010-<br>14                                   | 2010-<br>14                                   | 2010-<br>14                                   | 2010-<br>14                                  | 2011-<br>14                                  | 2012-<br>14                                 | 2011-<br>14                                 | 2011-<br>14                                 | 2011-<br>14                                  | 2012-<br>14                                  | 2011-<br>14                                  |
| <b>In-Hospital Opioid Use, %</b>             | 48%                                  | 59%                                           | 46%                                           | 47%                                           | 47%                                           | 45%                                          | 47%                                          | 47%                                         | 33%                                         | 44%                                         | 37%                                          | 41%                                          | 37%                                          |
| <b>Outpatient Opioid Use, 90<br/>day, %</b>  | 4.8%                                 | 3.7%                                          | 5.0%                                          | 4.8%                                          | 4.3%                                          | 7.0%                                         | 4.7%                                         | 7.2%                                        | 3.3%                                        | 5.4%                                        | 5.0%                                         | 6.1%                                         | 4.4%                                         |
| <b>Outpatient Opioid Use, 365<br/>day, %</b> | 6.3%                                 | 4.9%                                          | 6.3%                                          | 6.2%                                          | 5.7%                                          | 9.2%                                         | 6.6%                                         | 9.3%                                        | 4.6%                                        | 7.3%                                        | 6.1%                                         | 8.1%                                         | 5.7%                                         |
| <b>Age, years, med.</b>                      | 58                                   | 32                                            | 59                                            | 67                                            | 55                                            | 68                                           | 68                                           | 60                                          | 67                                          | 61                                          | 60                                           | 67                                           | 69                                           |
| <b>18-24, %</b>                              | 8%                                   | 17%                                           | 6%                                            | 2%                                            | 7%                                            | 2%                                           | 2%                                           | 7%                                          | 4%                                          | 12%                                         | 9%                                           | 2%                                           | 9%                                           |
| <b>25-34, %</b>                              | 17%                                  | 45%                                           | 8%                                            | 3%                                            | 20%                                           | 4%                                           | 3%                                           | 12%                                         | 5%                                          | 14%                                         | 16%                                          | 4%                                           | 11%                                          |
| <b>35-44, %</b>                              | 10%                                  | 16%                                           | 10%                                           | 5%                                            | 11%                                           | 6%                                           | 6%                                           | 9%                                          | 7%                                          | 7%                                          | 7%                                           | 7%                                           | 5%                                           |
| <b>45-54, %</b>                              | 11%                                  | 6%                                            | 16%                                           | 11%                                           | 13%                                           | 12%                                          | 12%                                          | 12%                                         | 12%                                         | 9%                                          | 9%                                           | 12%                                          | 8%                                           |
| <b>55-64, %</b>                              | 17%                                  | 6%                                            | 23%                                           | 23%                                           | 16%                                           | 19%                                          | 19%                                          | 18%                                         | 16%                                         | 14%                                         | 14%                                          | 20%                                          | 10%                                          |
| <b>65-74, %</b>                              | 17%                                  | 5%                                            | 20%                                           | 25%                                           | 14%                                           | 21%                                          | 22%                                          | 19%                                         | 18%                                         | 18%                                         | 18%                                          | 22%                                          | 17%                                          |
| <b>75+, %</b>                                | 22%                                  | 4%                                            | 17%                                           | 31%                                           | 20%                                           | 37%                                          | 36%                                          | 22%                                         | 27%                                         | 28%                                         | 26%                                          | 34%                                          | 40%                                          |
| <b>Sex, %</b>                                |                                      |                                               |                                               |                                               |                                               |                                              |                                              |                                             |                                             |                                             |                                              |                                              |                                              |
| <b>Male</b>                                  | 37%                                  | 5%                                            | 51%                                           | 53%                                           | 40%                                           | 45%                                          | 48%                                          | 40%                                         | 46%                                         | 35%                                         | 36%                                          | 45%                                          | 36%                                          |
| <b>Female</b>                                | 63%                                  | 95%                                           | 49%                                           | 48%                                           | 60%                                           | 55%                                          | 52%                                          | 60%                                         | 54%                                         | 65%                                         | 64%                                          | 55%                                          | 64%                                          |
| <b>Race, %</b>                               |                                      |                                               |                                               |                                               |                                               |                                              |                                              |                                             |                                             |                                             |                                              |                                              |                                              |
| <b>White</b>                                 | 82%                                  | 73%                                           | 81%                                           | 78%                                           | 79%                                           | 92%                                          | 92%                                          | 92%                                         | 78%                                         | 94%                                         | 97%                                          | 89%                                          | 98%                                          |
| <b>Black</b>                                 | 11%                                  | 18%                                           | 9%                                            | 16%                                           | 15%                                           | 5%                                           | 1%                                           | 5%                                          | 19%                                         | 4%                                          | 1%                                           | 9%                                           | 0%                                           |
| <b>Other</b>                                 | 3%                                   | 5%                                            | 3%                                            | 2%                                            | 2%                                            | 1%                                           | 1%                                           | 2%                                          | 1%                                          | 1%                                          | 1%                                           | 2%                                           | 0%                                           |
| <b>Missing</b>                               | 4%                                   | 4%                                            | 7%                                            | 4%                                            | 4%                                            | 3%                                           | 6%                                           | 0%                                          | 2%                                          | 1%                                          | 2%                                           | 1%                                           | 1%                                           |
| <b>Type of insurance, %</b>                  |                                      |                                               |                                               |                                               |                                               |                                              |                                              |                                             |                                             |                                             |                                              |                                              |                                              |
| <b>Commercial</b>                            | 47%                                  | 63%                                           | 47%                                           | 43%                                           | 43%                                           | 40%                                          | 44%                                          | 40%                                         | 30%                                         | 39%                                         | 37%                                          | 44%                                          | 35%                                          |
| <b>Medicare</b>                              | 35%                                  | 8%                                            | 36%                                           | 48%                                           | 34%                                           | 51%                                          | 49%                                          | 43%                                         | 49%                                         | 37%                                         | 44%                                          | 47%                                          | 48%                                          |

|                                                |     |     |     |      |     |     |     |     |     |     |     |     |     |
|------------------------------------------------|-----|-----|-----|------|-----|-----|-----|-----|-----|-----|-----|-----|-----|
| <b>Medicaid</b>                                | 12% | 23% | 10% | 6%   | 16% | 5%  | 3%  | 11% | 16% | 14% | 13% | 5%  | 13% |
| <b>Other</b>                                   | 6%  | 6%  | 7%  | 4%   | 7%  | 4%  | 4%  | 6%  | 4%  | 10% | 6%  | 3%  | 4%  |
| <b>Elixhauser Comorbidity Index, mean</b>      | 0.6 | 0.2 | 0.7 | 0.8  | 0.6 | 0.7 | 0.6 | 0.5 | 0.7 | 0.5 | 0.5 | 0.6 | 0.4 |
| <b>Hospitalization type, %</b>                 |     |     |     |      |     |     |     |     |     |     |     |     |     |
| <b>Medical only</b>                            | 63% | 69% | 63% | 49%  | 62% | 71% | 65% | 59% | 58% | 55% | 70% | 67% | 66% |
| <b>Medical w/ICU</b>                           | 7%  | 2%  | 13% | 6%   | 10% | 5%  | 9%  | 6%  | 16% | 7%  | 6%  | 10% | 10% |
| <b>Surgical only</b>                           | 24% | 26% | 14% | 34%  | 23% | 22% | 21% | 30% | 20% | 31% | 21% | 20% | 22% |
| <b>Surgical w/ ICU</b>                         | 6%  | 3%  | 10% | 11%  | 5%  | 2%  | 6%  | 6%  | 7%  | 8%  | 2%  | 3%  | 2%  |
| <b>Hospital LOS, days, median.</b>             | 4   | 3   | 4   | 4    | 4   | 4   | 4   | 3   | 5   | 3   | 4   | 4   | 3   |
| <b>Mortality, 90 day, %</b>                    | 2%  | 0%  | 2%  | 3%   | 2%  | 3%  | 3%  | 2%  | 4%  | 2%  | 2%  | 3%  | 3%  |
| <b>Mortality, 365 day, %</b>                   | 6%  | 1%  | 7%  | 9%   | 5%  | 9%  | 9%  | 6%  | 9%  | 6%  | 6%  | 9%  | 8%  |
| <b>Readmission, 90 day, %</b>                  | 23% | 14% | 26% | 28%  | 24% | 23% | 26% | 24% | 29% | 24% | 26% | 26% | 26% |
| <b>Readmission, 365 day, %</b>                 | 40% | 26% | 42% | 47%  | 42% | 42% | 44% | 41% | 53% | 43% | 46% | 43% | 48% |
| <b>Modified HCUP CCS Conditions, %</b>         |     |     |     |      |     |     |     |     |     |     |     |     |     |
| <b>Cardiovascular</b>                          | 20% | 8%  | 22% | 32%  | 20% | 20% | 29% | 25% | 24% | 18% | 15% | 24% | 18% |
| <b>Respiratory</b>                             | 6%  | 1%  | 4%  | 7%   | 6%  | 9%  | 8%  | 5%  | 11% | 8%  | 12% | 11% | 11% |
| <b>Gastrointestinal</b>                        | 9%  | 2%  | 10% | 10%  | 8%  | 16% | 16% | 11% | 13% | 13% | 11% | 15% | 11% |
| <b>Oncologic</b>                               | 10% | 8%  | 16% | 16%  | 6%  | 6%  | 12% | 7%  | 4%  | 5%  | 4%  | 6%  | 4%  |
| <b>Genitourinary/Maternal Health</b>           | 11% | 22% | 3%  | 5%   | 12% | 6%  | 8%  | 15% | 7%  | 16% | 16% | 6%  | 24% |
| <b>Neurological and Mental Health</b>          | 6%  | 1%  | 12% | 3%   | 12% | 4%  | 3%  | 3%  | 17% | 2%  | 10% | 3%  | 2%  |
| <b>Musculoskeletal, Trauma, and Orthopedic</b> | 22% | 34% | 21% | 17%  | 21% | 23% | 15% | 18% | 10% | 17% | 15% | 18% | 9%  |
| <b>Endocrine &amp; Hematologic</b>             | 5%  | 8%  | 6%  | 4.0% | 4%  | 9%  | 4%  | 6%  | 5%  | 6%  | 4%  | 7%  | 4%  |
| <b>Other</b>                                   | 10% | 16% | 6%  | 6%   | 12% | 8%  | 7%  | 10% | 11% | 14% | 14% | 9%  | 17% |
| <b>Comorbidities , %</b>                       |     |     |     |      |     |     |     |     |     |     |     |     |     |
| <b>Musculoskeletal Pain Conditions</b>         | 29% | 13% | 29% | 43%  | 26% | 53% | 32% | 25% | 31% | 26% | 26% | 41% | 32% |

|                                                 |     |      |     |     |     |     |     |     |     |     |     |     |     |
|-------------------------------------------------|-----|------|-----|-----|-----|-----|-----|-----|-----|-----|-----|-----|-----|
| <b>Depression</b>                               | 13% | 8.6% | 14% | 15% | 14% | 19% | 11% | 12% | 16% | 11% | 15% | 13% | 10% |
| <b>Other Mental Disorders</b>                   | 3%  | 1%   | 3%  | 3%  | 2%  | 5%  | 3%  | 2%  | 5%  | 3%  | 4%  | 4%  | 5%  |
| <b>Alcohol Use Disorder</b>                     | 1%  | 0%   | 1%  | 1%  | 4%  | 1%  | 1%  | 1%  | 3%  | 1%  | 1%  | 1%  | 0%  |
| <b>Drug Dependence/Opioid-Related Poisoning</b> | 1%  | 1%   | 1%  | 0%  | 4%  | 0%  | 0%  | 0%  | 3%  | 0%  | 1%  | 0%  | 0%  |
| <b>History of Benzodiazepine Use, %</b>         | 5%  | 4%   | 3%  | 4%  | 3%  | 5%  | 4%  | 3%  | 5%  | 6%  | 6%  | 6%  | 5%  |

**Supplement Table 9. Examination of effect modification by hospital of the association between any inpatient opioid use and outpatient opioid use, 90 days post-discharge**

| Outcomes                         | Percentages (95% CI) with outpatient opioid use |                      | Percentage Point Difference in Use (95% CI) |
|----------------------------------|-------------------------------------------------|----------------------|---------------------------------------------|
|                                  | No Inpatient Use                                | Inpatient Opioid Use |                                             |
| <b>At 90 days post-discharge</b> |                                                 |                      |                                             |
| Hospital 1                       | 2.2 (1.9, 2.4)                                  | 5.0 (4.7, 5.3)       | +2.8 (2.5, 3.1)                             |
| Hospital 2                       | 2.8 (2.6, 3.1)                                  | 6.6 (6.2, 7.0)       | +3.8 (3.4, 4.2)                             |
| Hospital 3                       | 3.0 (2.7, 3.4)                                  | 5.0 (4.6, 5.4)       | +2.0 (1.6, 2.4)                             |
| Hospital 4                       | 2.7 (2.3, 3.0)                                  | 5.8 (5.3, 6.3)       | +3.1 (2.6, 3.6)                             |
| Hospital 5                       | 4.5 (4.0, 5.0)                                  | 8.3 (7.6, 8.9)       | +3.8 (3.1, 4.4)                             |
| Hospital 6                       | 3.4 (3.0, 3.9)                                  | 5.2 (4.6, 5.7)       | +1.8 (1.2, 2.3)                             |
| Hospital 7                       | 4.1 (3.5, 4.7)                                  | 8.2 (7.4, 9.0)       | +4.1 (3.3, 4.9)                             |
| Hospital 8                       | 2.4 (1.8, 3.0)                                  | 5.1 (4.1, 6.1)       | +2.7 (1.7, 3.7)                             |
| Hospital 9                       | 3.4 (2.7, 4.1)                                  | 6.6 (5.6, 7.5)       | +3.2 (2.2, 4.1)                             |
| Hospital 10                      | 3.4 (2.7, 4.1)                                  | 6.6 (5.4, 7.8)       | +3.2 (2.0, 4.4)                             |
| Hospital 11                      | 3.1 (2.4, 3.8)                                  | 7.4 (6.3, 8.6)       | +4.3 (3.2, 5.5)                             |
| Hospital 12                      | 3.9 (2.5, 5.4)                                  | 4.8 (3.1, 6.5)       | +0.9 (-0.8, 2.6)                            |

**Supplement Table 10. Examination of effect modification by hospital of the association between any inpatient opioid use and outpatient opioid use, 365 days post-discharge**

| Outcomes                          | Percentages (95% CI) with outpatient opioid use |                      | Percentage Point Difference in Use (95% CI) |
|-----------------------------------|-------------------------------------------------|----------------------|---------------------------------------------|
|                                   | No Inpatient Use                                | Inpatient Opioid Use |                                             |
| <b>At 365 days post-discharge</b> |                                                 |                      |                                             |
| Hospital 1                        | 3.4 (3.1, 3.7)                                  | 6.7 (6.3, 7.1)       | +3.3 (2.9, 3.7)                             |
| Hospital 2                        | 4.0 (3.7, 4.3)                                  | 8.2 (7.8, 8.7)       | +4.2 (3.8, 4.7)                             |
| Hospital 3                        | 4.2 (3.9, 4.6)                                  | 6.6 (6.1, 7.0)       | +2.4 (1.9, 2.8)                             |
| Hospital 4                        | 3.9 (3.5, 4.3)                                  | 7.7 (7.1, 8.3)       | +3.8 (3.2, 4.4)                             |
| Hospital 5                        | 6.6 (6.0, 7.1)                                  | 10.2 (9.5, 10.9)     | +3.6 (2.9, 4.3)                             |
| Hospital 6                        | 5.1 (4.6, 5.6)                                  | 7.3 (6.6, 7.9)       | +2.2 (1.5, 2.8)                             |
| Hospital 7                        | 5.5 (4.9, 6.2)                                  | 9.9 (9.0, 10.8)      | +4.4 (3.5, 5.3)                             |
| Hospital 8                        | 3.8 (3.1, 4.5)                                  | 7.1 (5.9, 8.3)       | +3.3 (2.1, 4.5)                             |
| Hospital 9                        | 5.4 (4.5, 6.2)                                  | 8.6 (7.5, 9.7)       | +3.2 (2.1, 4.3)                             |
| Hospital 10                       | 4.5 (3.7, 5.3)                                  | 8.0 (6.7, 9.3)       | +3.5 (2.2, 4.8)                             |
| Hospital 11                       | 4.4 (3.6, 5.2)                                  | 9.3 (8.0, 10.6)      | +4.9 (3.6, 6.2)                             |
| Hospital 12                       | 5.4 (3.9, 6.9)                                  | 5.9 (4.0, 7.8)       | +0.5 (-1.4, 2.4)                            |

Supplement Tables 9 and 10 show results from analyses with interaction terms between hospital indicators and any inpatient opioid use (our main predictor variable). We used the margins command in STATA to obtain the predicted risk of outpatient opioid use post-discharge based on the hospital interaction terms.
